# Supplementary material for: Importance of O⋯N interaction between nitro groups in crystals
Source: Royal Society of Chemistry journal article supplement (doi:10.1039/c3ce41788c), 2013-01-01
Supplement: c3ce41788c.pdf [file c3ce41788c.pdf]

Table S1. Energy of dimer (AB) and each monomer (A, B), basis-set superposition error [a.u.] and interaction energy [kcal/mol].

| Refcode     | atoms      | E(AB)         | E(A)          | E(B)          | BSSE      | E <sub>int</sub> |
|-------------|------------|---------------|---------------|---------------|-----------|------------------|
| CIWMEA10    | O6...N3    | -1569.8682564 | -784.9308300  | -784.9300827  | 0.0070633 | -4.61            |
| CUGCOW      | O4...N1    | -3474.5707741 | -1737.2791733 | -1737.2787861 | 0.0236098 | -8.04            |
| DEMSOD      | O4...N2    | -1736.4105624 | -868.2032067  | -868.2020766  | 0.0053334 | -3.31            |
| FIHLOY      | O1(2)...N2 | -1357.6044369 | -678.7971005  | -678.7968975  | 0.0144598 | -6.55            |
| FIHLOY      | O5(6)...N4 | -1357.8773625 | -678.9336798  | -678.9338929  | 0.0148791 | -6.14            |
| FINMAQ      | O3...N1    | -2524.2890052 | -1262.1314832 | -1262.1476164 | 0.0117629 | -6.22            |
| FINMAQ      | O5...N2    | -2524.2637981 | -1262.1291333 | -1262.1279284 | 0.0060992 | -4.23            |
| HOPKON      | O1...N6    | -1001.8230685 | -500.9078902  | -500.9046596  | 0.0079716 | -6.60            |
| HOPKUT      | O4...N9    | -923.4612149  | -461.7119126  | -461.7460576  | 0.0067248 | -2.04            |
| CCDC-875783 | O1A...N2A  | -1980.3483101 | -990.1692187  | -990.1708717  | 0.0063036 | -5.16            |
| CCDC-875783 | O2A...N2A  | -1980.3489804 | -990.1713764  | -990.1695165  | 0.0071061 | -5.07            |
