# Supplementary material for: Importance of O⋯N interaction between nitro groups in crystals
Source: Royal Society of Chemistry journal article supplement (doi:10.1039/c3ce41788c), 2013-01-01
Supplement: c3ce41788c_2.pdf [file c3ce41788c_2.pdf]

Arkusz1

| REFCODE         | NO           | OO           | PL1PL2        | OPL1         | OO-NO        | NO-OPL1      |
|-----------------|--------------|--------------|---------------|--------------|--------------|--------------|
| AHOGAF          | 3.118        | 3.316        | 87.172        | 3.051        | 0.198        | 0.067        |
| BEYDOY          | 2.942        | 2.967        | 80.338        | 2.739        | 0.025        | 0.203        |
| BIDVAM          | 2.876        | 2.913        | 85.619        | 2.812        | 0.037        | 0.064        |
| BIDVAM          | 2.876        | 3.144        | 85.619        | 2.812        | 0.268        | 0.064        |
| BIMFAF          | 3.033        | 3.268        | 82.479        | 3.024        | 0.235        | 0.009        |
| BIMFAF          | 3.033        | 3.174        | 82.479        | 3.024        | 0.141        | 0.009        |
| BURJON          | 3.156        | 3.295        | 87.896        | 2.911        | 0.139        | 0.245        |
| BUYJAG          | 3.072        | 3.320        | 85.378        | 2.993        | 0.248        | 0.079        |
| CETHUF          | 3.027        | 3.490        | 81.635        | 2.959        | 0.463        | 0.068        |
| CETHUF          | 3.027        | 3.080        | 81.635        | 2.959        | 0.053        | 0.068        |
| CIHQIT          | 3.083        | 3.248        | 86.081        | 3.066        | 0.165        | 0.017        |
| CIHQIT          | 3.083        | 3.256        | 86.081        | 3.066        | 0.173        | 0.017        |
| <b>CIWMEA10</b> | <b>2.922</b> | <b>3.087</b> | <b>85.685</b> | <b>2.886</b> | <b>0.165</b> | <b>0.036</b> |
| <b>CIWMEA10</b> | <b>2.922</b> | <b>3.082</b> | <b>85.685</b> | <b>2.886</b> | <b>0.160</b> | <b>0.036</b> |
| <b>CUGCOW</b>   | <b>2.804</b> | <b>3.297</b> | <b>89.297</b> | <b>2.728</b> | <b>0.493</b> | <b>0.076</b> |
| <b>CUGCOW</b>   | <b>2.804</b> | <b>2.906</b> | <b>89.297</b> | <b>2.728</b> | <b>0.102</b> | <b>0.076</b> |
| CUVDUS          | 3.212        | 3.313        | 81.447        | 3.193        | 0.101        | 0.019        |
| CUVDUS          | 3.212        | 3.526        | 81.447        | 3.193        | 0.314        | 0.019        |
| CUVTOC          | 2.939        | 3.002        | 86.244        | 2.824        | 0.063        | 0.115        |
| CUVTOC          | 2.939        | 3.060        | 86.244        | 2.824        | 0.121        | 0.115        |
| CUVXOG          | 3.154        | 3.468        | 81.468        | 3.081        | 0.314        | 0.073        |
| <b>DEMSOD</b>   | <b>2.890</b> | <b>3.139</b> | <b>80.652</b> | <b>2.890</b> | <b>0.249</b> | <b>0.000</b> |
| <b>DEMSOD</b>   | <b>2.890</b> | <b>3.123</b> | <b>80.652</b> | <b>2.890</b> | <b>0.233</b> | <b>0.000</b> |
| DERGAJ          | 2.872        | 3.142        | 83.522        | 2.864        | 0.270        | 0.008        |
| DERGAJ          | 2.872        | 3.180        | 83.522        | 2.864        | 0.308        | 0.008        |
| DICHUS          | 3.254        | 3.322        | 85.065        | 3.227        | 0.068        | 0.027        |
| DUKLAX          | 2.969        | 3.091        | 88.637        | 2.949        | 0.122        | 0.020        |
| DUKLAX          | 2.969        | 3.219        | 88.637        | 2.949        | 0.250        | 0.020        |
| DULSEJ          | 3.177        | 3.428        | 86.056        | 3.001        | 0.251        | 0.176        |
| DULSEJ          | 3.277        | 3.365        | 85.287        | 3.255        | 0.088        | 0.022        |
| DULSEJ          | 3.277        | 3.538        | 85.287        | 3.255        | 0.261        | 0.022        |
| DUPJUJ          | 3.022        | 3.314        | 83.453        | 2.903        | 0.292        | 0.119        |
| ECUXUW          | 2.976        | 3.080        | 86.463        | 2.937        | 0.104        | 0.039        |
| ECUXUW          | 2.976        | 3.195        | 86.463        | 2.937        | 0.219        | 0.039        |
| EMOCEO          | 3.134        | 3.433        | 89.876        | 3.030        | 0.299        | 0.104        |
| ENIGIR          | 2.802        | 3.071        | 84.696        | 2.790        | 0.269        | 0.012        |
| ENIGIR          | 2.802        | 2.961        | 84.696        | 2.790        | 0.159        | 0.012        |
| EROZUH          | 3.118        | 3.361        | 84.272        | 3.117        | 0.243        | 0.001        |
| EROZUH          | 3.118        | 3.331        | 84.272        | 3.117        | 0.213        | 0.001        |
| FABRIJ02        | 2.906        | 3.068        | 88.117        | 2.895        | 0.162        | 0.011        |

Arkusz1

|               |              |              |               |              |              |              |
|---------------|--------------|--------------|---------------|--------------|--------------|--------------|
| FABRIJ02      | 2.906        | 3.167        | 88.117        | 2.895        | 0.261        | 0.011        |
| FADGUM        | 2.998        | 3.207        | 85.537        | 2.990        | 0.209        | 0.008        |
| FADGUM        | 2.998        | 3.190        | 85.537        | 2.990        | 0.192        | 0.008        |
| FAFTHA        | 2.954        | 3.128        | 84.329        | 2.946        | 0.174        | 0.008        |
| FAFTHA        | 2.954        | 3.267        | 84.329        | 2.946        | 0.313        | 0.008        |
| FESNEW        | 3.146        | 3.316        | 80.510        | 3.034        | 0.170        | 0.112        |
| FESNEW01      | 3.134        | 3.327        | 80.475        | 3.002        | 0.193        | 0.132        |
| <b>FIHLOY</b> | <b>2.832</b> | <b>3.044</b> | <b>89.980</b> | <b>2.829</b> | <b>0.212</b> | <b>0.003</b> |
| <b>FIHLOY</b> | <b>2.905</b> | <b>3.198</b> | <b>88.630</b> | <b>2.836</b> | <b>0.293</b> | <b>0.069</b> |
| <b>FIHLOY</b> | <b>2.848</b> | <b>3.041</b> | <b>89.980</b> | <b>2.830</b> | <b>0.193</b> | <b>0.018</b> |
| <b>FIHLOY</b> | <b>2.831</b> | <b>3.151</b> | <b>88.630</b> | <b>2.823</b> | <b>0.320</b> | <b>0.008</b> |
| <b>FIHLOY</b> | <b>2.832</b> | <b>3.077</b> | <b>89.980</b> | <b>2.829</b> | <b>0.245</b> | <b>0.003</b> |
| <b>FIHLOY</b> | <b>2.905</b> | <b>2.914</b> | <b>88.630</b> | <b>2.836</b> | <b>0.009</b> | <b>0.069</b> |
| <b>FIHLOY</b> | <b>2.848</b> | <b>3.224</b> | <b>89.980</b> | <b>2.830</b> | <b>0.376</b> | <b>0.018</b> |
| <b>FIHLOY</b> | <b>2.831</b> | <b>3.008</b> | <b>88.630</b> | <b>2.823</b> | <b>0.177</b> | <b>0.008</b> |
| FINFUE        | 3.073        | 3.105        | 81.063        | 2.673        | 0.032        | 0.400        |
| <b>FINMAQ</b> | <b>2.842</b> | <b>3.230</b> | <b>81.012</b> | <b>2.819</b> | <b>0.388</b> | <b>0.023</b> |
| <b>FINMAQ</b> | <b>2.842</b> | <b>3.008</b> | <b>81.012</b> | <b>2.819</b> | <b>0.166</b> | <b>0.023</b> |
| FOPFUM        | 3.008        | 3.384        | 87.472        | 2.893        | 0.376        | 0.115        |
| FOPFUM        | 3.008        | 3.416        | 87.472        | 2.893        | 0.408        | 0.115        |
| FOVBOH        | 3.249        | 3.486        | 82.440        | 3.235        | 0.237        | 0.014        |
| FOVBOH        | 3.249        | 3.375        | 82.440        | 3.235        | 0.126        | 0.014        |
| FOYDON        | 2.918        | 3.356        | 82.765        | 2.876        | 0.438        | 0.042        |
| FOYDON        | 2.918        | 3.018        | 82.765        | 2.876        | 0.100        | 0.042        |
| GACYOZ        | 3.101        | 3.316        | 86.511        | 2.977        | 0.215        | 0.124        |
| GADGID        | 3.070        | 3.414        | 85.781        | 3.003        | 0.344        | 0.067        |
| GEYDOD        | 2.885        | 3.221        | 80.006        | 2.874        | 0.336        | 0.011        |
| GEYDOD        | 2.885        | 3.033        | 80.006        | 2.874        | 0.148        | 0.011        |
| GIGSUK        | 3.071        | 3.345        | 84.103        | 3.068        | 0.274        | 0.003        |
| GIGSUK        | 3.071        | 3.307        | 84.103        | 3.068        | 0.236        | 0.003        |
| GISPEE        | 3.059        | 3.072        | 83.858        | 2.877        | 0.013        | 0.182        |
| GISPEE01      | 3.092        | 3.105        | 86.267        | 2.924        | 0.013        | 0.168        |
| GIYZUJ        | 3.261        | 3.331        | 85.734        | 3.194        | 0.070        | 0.067        |
| GUPICA        | 2.960        | 3.017        | 81.019        | 2.920        | 0.057        | 0.040        |
| GUPICA        | 2.960        | 3.288        | 81.019        | 2.920        | 0.328        | 0.040        |
| GUPICA        | 3.012        | 3.376        | 84.077        | 2.964        | 0.364        | 0.048        |
| GUPICA        | 3.012        | 3.038        | 84.077        | 2.964        | 0.026        | 0.048        |
| GUPICA        | 3.031        | 3.119        | 89.599        | 2.793        | 0.088        | 0.238        |
| GURDAY        | 2.938        | 3.161        | 89.234        | 2.931        | 0.223        | 0.007        |
| GURDAY        | 2.938        | 3.248        | 89.234        | 2.931        | 0.310        | 0.007        |
| HEVYUC        | 3.272        | 3.300        | 85.515        | 3.035        | 0.028        | 0.237        |

Arkusz1

|               |              |              |               |              |              |              |
|---------------|--------------|--------------|---------------|--------------|--------------|--------------|
| HIKKIW01      | 3.178        | 3.287        | 80.839        | 3.144        | 0.109        | 0.034        |
| HIPDIT        | 3.077        | 3.224        | 80.400        | 2.797        | 0.147        | 0.280        |
| HIPDIT        | 2.996        | 3.267        | 80.400        | 2.930        | 0.271        | 0.066        |
| HIPDIT        | 2.996        | 3.018        | 80.400        | 2.930        | 0.022        | 0.066        |
| HNIABZ11      | 3.168        | 3.403        | 86.099        | 3.027        | 0.235        | 0.141        |
| <b>HOPKON</b> | <b>2.953</b> | <b>3.178</b> | <b>80.459</b> | <b>2.926</b> | <b>0.225</b> | <b>0.027</b> |
| <b>HOPKON</b> | <b>2.953</b> | <b>3.306</b> | <b>80.459</b> | <b>2.926</b> | <b>0.353</b> | <b>0.027</b> |
| <b>HOPKUT</b> | <b>2.872</b> | <b>3.247</b> | <b>88.321</b> | <b>2.798</b> | <b>0.375</b> | <b>0.074</b> |
| HUFFEU        | 3.148        | 3.540        | 89.944        | 3.107        | 0.392        | 0.041        |
| HUFFEU        | 3.148        | 3.217        | 89.944        | 3.107        | 0.069        | 0.041        |
| HUMQEM        | 3.122        | 3.377        | 86.380        | 3.050        | 0.255        | 0.072        |
| HUMQEM        | 3.122        | 3.130        | 86.380        | 3.050        | 0.008        | 0.072        |
| HUMQIQ        | 3.104        | 3.125        | 88.659        | 3.036        | 0.021        | 0.068        |
| HUMQIQ        | 3.104        | 3.350        | 88.659        | 3.036        | 0.246        | 0.068        |
| IJIZAD        | 3.143        | 3.188        | 84.461        | 3.063        | 0.045        | 0.080        |
| ILEKOZ        | 2.980        | 3.511        | 87.447        | 2.867        | 0.531        | 0.113        |
| ILEKOZ        | 2.980        | 3.007        | 87.447        | 2.867        | 0.027        | 0.113        |
| IPOZAO        | 2.914        | 3.009        | 80.299        | 2.876        | 0.095        | 0.038        |
| IPOZAO        | 2.914        | 3.327        | 80.299        | 2.876        | 0.413        | 0.038        |
| ISEMEZ        | 3.052        | 3.166        | 87.237        | 3.031        | 0.114        | 0.021        |
| ISEMEZ        | 3.052        | 3.403        | 87.237        | 3.031        | 0.351        | 0.021        |
| ITNOBE        | 2.875        | 2.907        | 82.473        | 2.777        | 0.032        | 0.098        |
| ITNOBE        | 2.875        | 3.012        | 82.474        | 2.777        | 0.137        | 0.098        |
